# Supplementary material for: Genome-Wide Characterization of Simple Sequence Repeat (SSR) Loci in Chinese Jujube and Jujube SSR Primer Transferability
Source: PLoS One. 2015 May 22;10(5):e0127812. doi: 10.1371/journal.pone.0127812 (PMC4441482; doi:10.1371/journal.pone.0127812)
Supplement: S3 Table — This table lists predominant motif types in jujube, apple, pear, grape, peach, strawberry, Prunus mume, and mulberry. (XLS) [file pone.0127812.s003.xls]

## Sheet: Sheet1
Table S3 Predominant types of SSR motifs in the genomes of 8 species.
Motifs types	Jujube	Apple	Pear	Grape	Peach	Strawberry	Prunus mume	Mulberry
Dinucleotide	AT/AT	AT/AT,	AG/CT,AT/AT	AT/AT	AG/CT	AG/CT	AG/CT	AT/AT
		AG/CT
Trinucleotide	AAT/ATT	AAC/GTT	AAG/CTT	AAT/ATT	AAT/ATT	AAG/CTT	AAT/ATT	AAT/ATT
		AAG/CTT	AAT/ATT		AAG/CTT		AAG/CTT
Tetranucleotide	AAAT/ATTT	AAAT/ATTT	AAAT/ATTT	AAAT/ATTT	AAAT/ATTT	AAAT/ATTT	AAAT/ATTT	AAAT/ATTT
Pentanucleotide	AAAAT/ATTTT	AAAAT/ATTTT	AAAAT/ATTTTT	AAAAT/ATTTT	AAAAT/ATTTT	AACGT/ACGTT	AAAAT/ATTTT	AAAAT/ATTTT
		ACGGG/CCCGT						AATAT/ATATT
Hexanucleotide	AAAAAG/CTTTTT	AAAAAT/ATTTTT	AAAAAT/ATTTTT	AAAAAT/ATTTTT	AAAAAT/ATTTTT	AAGAGG/CCTCTT	AAAAAT/ATTTTT	AAAAAT/ATTTTT
		ACATAT/ATATGT		AAAAAG/CTTTTT	AAAAAG/CTTTTT	AGAGGG/CCCTCT	AAAAAC/GTTTTT
					AAAAAC/GTTTTT
